# Supplementary material
Source: MDPI journal article supplement (https://www.mdpi.com/2078-1547/12/1/3)
Supplement: s1 [file s1]

# A Model for the Spread of Infectious Diseases

## Supplemental Material

**Ricardo A. G. Unglaub and Kathrin Spendier \***

UCCS Center for the Biofrontiers Institute and Department of Physics and Energy Science,  
University of Colorado at *Colorado Springs*, Colorado Springs, CO 80918, USA; [runglaub@uccs.edu](mailto:runglaub@uccs.edu)

\* Correspondence: [kspendie@uccs.edu](mailto:kspendie@uccs.edu)

Given the amount of data processed and associated graphs for each of the ten countries selected for the study of presumed deaths COVID-19 related, these have been separated into this supplemental material section that is associated with the paper. Table S1 shows the accumulated number of presumed deaths due to COVID-19 per day for the selected ten countries.

**Table S1:** accumulated number of presumed deaths due to COVID-19 taken from [1].

**Abbreviation Key:** China (CN), South Korea (SK), Italy (IT), Iran (IR), USA (US), Spain (SP), Germany (DE), United Kingdom (UK), Netherlands (NE).

| Date  | CN   | SK | IT | IR | US | SP | FR | DE | UK | NE |
|-------|------|----|----|----|----|----|----|----|----|----|
| 01/21 | 9    | 0  | 0  | 0  | 0  | 0  | 0  | 0  | 0  | 0  |
| 01/22 | 17   | 0  | 0  | 0  | 0  | 0  | 0  | 0  | 0  | 0  |
| 01/23 | 25   | 0  | 0  | 0  | 0  | 0  | 0  | 0  | 0  | 0  |
| 01/24 | 41   | 0  | 0  | 0  | 0  | 0  | 0  | 0  | 0  | 0  |
| 01/25 | 56   | 0  | 0  | 0  | 0  | 0  | 0  | 0  | 0  | 0  |
| 01/26 | 80   | 0  | 0  | 0  | 0  | 0  | 0  | 0  | 0  | 0  |
| 01/27 | 106  | 0  | 0  | 0  | 0  | 0  | 0  | 0  | 0  | 0  |
| 01/28 | 132  | 0  | 0  | 0  | 0  | 0  | 0  | 0  | 0  | 0  |
| 01/29 | 170  | 0  | 0  | 0  | 0  | 0  | 0  | 0  | 0  | 0  |
| 01/30 | 213  | 0  | 0  | 0  | 0  | 0  | 0  | 0  | 0  | 0  |
| 01/31 | 259  | 0  | 0  | 0  | 0  | 0  | 0  | 0  | 0  | 0  |
| 02/01 | 304  | 0  | 0  | 0  | 0  | 0  | 0  | 0  | 0  | 0  |
| 02/02 | 361  | 0  | 0  | 0  | 0  | 0  | 0  | 0  | 0  | 0  |
| 02/03 | 425  | 0  | 0  | 0  | 0  | 0  | 0  | 0  | 0  | 0  |
| 02/04 | 490  | 0  | 0  | 0  | 0  | 0  | 0  | 0  | 0  | 0  |
| 02/05 | 563  | 0  | 0  | 0  | 0  | 0  | 0  | 0  | 0  | 0  |
| 02/06 | 636  | 0  | 0  | 0  | 0  | 0  | 0  | 0  | 0  | 0  |
| 02/07 | 722  | 0  | 0  | 0  | 0  | 0  | 0  | 0  | 0  | 0  |
| 02/08 | 811  | 0  | 0  | 0  | 0  | 0  | 0  | 0  | 0  | 0  |
| 02/09 | 908  | 0  | 0  | 0  | 0  | 0  | 0  | 0  | 0  | 0  |
| 02/10 | 1016 | 0  | 0  | 0  | 0  | 0  | 0  | 0  | 0  | 0  |
| 02/11 | 1113 | 0  | 0  | 0  | 0  | 0  | 0  | 0  | 0  | 0  |
| 02/12 | 1259 | 0  | 0  | 0  | 0  | 0  | 0  | 0  | 0  | 0  |
| 02/13 | 1380 | 0  | 0  | 0  | 0  | 0  | 0  | 0  | 0  | 0  |
| 02/14 | 1523 | 0  | 0  | 0  | 0  | 0  | 0  | 0  | 0  | 0  |
| 02/15 | 1665 | 0  | 0  | 0  | 0  | 0  | 1  | 0  | 0  | 0  |

|       |      |     |       |      |      |       |      |      |      |      |
|-------|------|-----|-------|------|------|-------|------|------|------|------|
| 02/16 | 1770 | 0   | 0     | 0    | 0    | 0     | 1    | 0    | 0    | 0    |
| 02/17 | 1868 | 0   | 0     | 0    | 0    | 0     | 1    | 0    | 0    | 0    |
| 02/18 | 2004 | 0   | 0     | 0    | 0    | 0     | 1    | 0    | 0    | 0    |
| 02/19 | 2118 | 0   | 0     | 2    | 0    | 0     | 1    | 0    | 0    | 0    |
| 02/20 | 2236 | 1   | 0     | 2    | 0    | 0     | 1    | 0    | 0    | 0    |
| 02/21 | 2345 | 2   | 1     | 4    | 0    | 0     | 1    | 0    | 0    | 0    |
| 02/22 | 2442 | 2   | 2     | 6    | 0    | 0     | 1    | 0    | 0    | 0    |
| 02/23 | 2592 | 6   | 3     | 8    | 0    | 0     | 1    | 0    | 0    | 0    |
| 02/24 | 2663 | 8   | 7     | 12   | 0    | 0     | 1    | 0    | 0    | 0    |
| 02/25 | 2715 | 11  | 11    | 16   | 0    | 0     | 1    | 0    | 0    | 0    |
| 02/26 | 2744 | 12  | 12    | 19   | 0    | 0     | 2    | 0    | 0    | 0    |
| 02/27 | 2788 | 13  | 17    | 26   | 0    | 0     | 2    | 0    | 0    | 0    |
| 02/28 | 2835 | 16  | 21    | 34   | 0    | 0     | 2    | 0    | 0    | 0    |
| 02/29 | 2870 | 17  | 29    | 43   | 1    | 0     | 2    | 0    | 0    | 0    |
| 03/01 | 2912 | 21  | 41    | 54   | 1    | 0     | 2    | 0    | 0    | 0    |
| 03/02 | 2943 | 28  | 52    | 66   | 6    | 0     | 3    | 0    | 0    | 0    |
| 03/03 | 2981 | 32  | 79    | 77   | 9    | 1     | 4    | 0    | 0    | 0    |
| 03/04 | 3012 | 35  | 107   | 92   | 11   | 2     | 4    | 0    | 0    | 0    |
| 03/05 | 3042 | 42  | 148   | 108  | 12   | 3     | 7    | 0    | 1    | 0    |
| 03/06 | 3070 | 43  | 197   | 124  | 15   | 8     | 9    | 0    | 1    | 1    |
| 03/07 | 3097 | 48  | 233   | 145  | 19   | 10    | 16   | 0    | 1    | 1    |
| 03/08 | 3119 | 50  | 366   | 194  | 22   | 17    | 19   | 0    | 2    | 3    |
| 03/09 | 3136 | 53  | 463   | 237  | 26   | 30    | 30   | 2    | 3    | 4    |
| 03/10 | 3158 | 60  | 631   | 291  | 30   | 36    | 33   | 2    | 7    | 4    |
| 03/11 | 3169 | 60  | 827   | 354  | 38   | 55    | 48   | 3    | 7    | 5    |
| 03/12 | 3176 | 66  | 1016  | 429  | 41   | 86    | 61   | 6    | 9    | 5    |
| 03/13 | 3189 | 67  | 1266  | 514  | 49   | 133   | 79   | 8    | 10   | 10   |
| 03/14 | 3199 | 72  | 1441  | 611  | 57   | 196   | 91   | 9    | 28   | 12   |
| 03/15 | 3213 | 75  | 1809  | 724  | 68   | 294   | 127  | 13   | 43   | 20   |
| 03/16 | 3226 | 75  | 2158  | 853  | 86   | 342   | 148  | 17   | 65   | 24   |
| 03/17 | 3237 | 81  | 2503  | 988  | 109  | 533   | 175  | 26   | 81   | 43   |
| 03/18 | 3245 | 84  | 2978  | 1135 | 150  | 638   | 264  | 28   | 115  | 58   |
| 03/19 | 3248 | 91  | 3405  | 1284 | 207  | 831   | 372  | 44   | 158  | 76   |
| 03/20 | 3255 | 94  | 4032  | 1433 | 256  | 1093  | 450  | 68   | 194  | 106  |
| 03/21 | 3261 | 102 | 4825  | 1556 | 302  | 1381  | 562  | 84   | 250  | 136  |
| 03/22 | 3270 | 104 | 5476  | 1685 | 414  | 1772  | 674  | 94   | 285  | 179  |
| 03/23 | 3277 | 111 | 6077  | 1812 | 555  | 2311  | 860  | 123  | 359  | 213  |
| 03/24 | 3281 | 120 | 6820  | 1934 | 780  | 2991  | 1100 | 159  | 508  | 276  |
| 03/25 | 3287 | 126 | 7503  | 2077 | 1027 | 3647  | 1331 | 206  | 649  | 356  |
| 03/26 | 3292 | 131 | 8215  | 2234 | 1295 | 4365  | 1696 | 267  | 877  | 434  |
| 03/27 | 3295 | 139 | 9134  | 2378 | 1696 | 5138  | 1995 | 351  | 1161 | 546  |
| 03/28 | 3300 | 144 | 10023 | 2517 | 2221 | 5982  | 2314 | 433  | 1459 | 639  |
| 03/29 | 3300 | 152 | 10779 | 2640 | 2583 | 6803  | 2606 | 541  | 1669 | 771  |
| 03/30 | 3305 | 158 | 11591 | 2757 | 3141 | 7716  | 3024 | 645  | 2043 | 864  |
| 03/31 | 3312 | 162 | 12482 | 2898 | 4053 | 8464  | 3523 | 775  | 2425 | 1039 |
| 04/01 | 3318 | 165 | 13155 | 3036 | 5102 | 9387  | 4032 | 931  | 3095 | 1173 |
| 04/02 | 3326 | 169 | 13915 | 3160 | 6076 | 10348 | 5387 | 1107 | 3747 | 1339 |
| 04/03 | 3329 | 174 | 14681 | 3294 | 7121 | 11198 | 6507 | 1275 | 4461 | 1487 |

|       |      |     |       |      |       |       |       |      |       |      |
|-------|------|-----|-------|------|-------|-------|-------|------|-------|------|
| 04/04 | 3331 | 177 | 15362 | 3452 | 8452  | 11947 | 7560  | 1444 | 5221  | 1651 |
| 04/05 | 3331 | 183 | 15887 | 3603 | 9616  | 12641 | 8078  | 1584 | 5865  | 1766 |
| 04/06 | 3331 | 186 | 16523 | 3739 | 10941 | 13341 | 8911  | 1810 | 6433  | 1867 |
| 04/07 | 3333 | 192 | 17127 | 3872 | 12848 | 14045 | 10328 | 2016 | 7471  | 2101 |
| 04/08 | 3335 | 200 | 17669 | 3993 | 14788 | 14729 | 10869 | 2349 | 8505  | 2248 |
| 04/09 | 3336 | 204 | 18279 | 4110 | 16691 | 15447 | 12210 | 2607 | 9608  | 2396 |
| 04/10 | 3339 | 208 | 18849 | 4232 | 18747 | 16081 | 13197 | 2736 | 10760 | 2511 |
| 04/11 | 3339 | 211 | 19468 | 4357 | 20577 | 16606 | 13832 | 2871 | 11599 | 2643 |
| 04/12 | 3341 | 214 | 19899 | 4474 | 22105 | 17209 | 14393 | 3022 | 12285 | 2737 |
| 04/13 | 3341 | 217 | 20465 | 4585 | 23640 | 17756 | 14967 | 3194 | 13029 | 2823 |
| 04/14 | 3342 | 222 | 21067 | 4683 | 29825 | 18255 | 15729 | 3495 | 14073 | 2945 |
| 04/15 | 3342 | 225 | 21645 | 4777 | 32443 | 18812 | 17167 | 3804 | 14915 | 3134 |
| 04/16 | 3342 | 229 | 22170 | 4869 | 34619 | 19130 | 17920 | 4052 | 15944 | 3315 |
| 04/17 | 4632 | 230 | 22745 | 4958 | 37154 | 19478 | 18681 | 4352 | 16879 | 3459 |
| 04/18 | 4632 | 232 | 23227 | 5031 | 39014 | 20043 | 19323 | 4538 | 17994 | 3601 |
| 04/19 | 4632 | 234 | 23660 | 5118 | 40575 | 20453 | 19718 | 4642 | 18492 | 3668 |
| 04/20 | 4632 | 236 | 24114 | 5209 | 42514 | 20852 | 20265 | 4862 | 19051 | 3751 |
| 04/21 | 4632 | 238 | 24648 | 5297 | 45318 | 21282 | 20796 | 5086 | 20223 | 3916 |
| 04/22 | 4632 | 240 | 25085 | 5391 | 47681 | 21717 | 21340 | 5315 | 21060 | 4055 |
| 04/23 | 4632 | 240 | 25549 | 5481 | 50243 | 22157 | 21856 | 5575 | 21787 | 4177 |
| 04/24 | 4632 | 240 | 25669 | 5574 | 52193 | 22524 | 22245 | 5760 | 22792 | 4289 |
| 04/25 | 4632 | 242 | 26384 | 5650 | 54265 | 22902 | 22614 | 5877 | 23635 | 4409 |
| 04/26 | 4633 | 243 | 26644 | 5710 | 55415 | 23190 | 22856 | 5976 | 24055 | 4475 |
| 04/27 | 4633 | 244 | 26977 | 5806 | 56803 | 23521 | 23293 | 6126 | 24393 | 4518 |
| 04/28 | 4633 | 244 | 27359 | 5877 | 59266 | 23822 | 23660 | 6314 | 25302 | 4566 |
| 04/29 | 4633 | 246 | 27682 | 5957 | 61656 | 24275 | 24087 | 6467 | 26097 | 4711 |
| 04/30 | 4633 | 247 | 27967 | 6028 | 63861 | 24543 | 24376 | 6623 | 26771 | 4795 |
| 05/01 | 4633 | 248 | 28236 | 6091 | 65753 | 24824 | 24594 | 6736 | 27510 | 4893 |
| 05/02 | 4633 | 250 | 28710 | 6156 | 67444 | 25100 | 24760 | 6812 | 28131 | 4897 |
| 05/03 | 4633 | 250 | 28884 | 6203 | 68597 | 25264 | 24895 | 6866 | 28446 | 5056 |
| 05/04 | 4633 | 252 | 29079 | 6277 | 69921 | 25428 | 25201 | 6993 | 28734 | 5082 |
| 05/05 | 4633 | 254 | 29315 | 6340 | 72271 | 25613 | 25531 | 6993 | 29427 | 5168 |
| 05/06 | 4633 | 255 | 29684 | 6418 | 74799 | 25875 | 25809 | 7275 | 30076 | 5204 |
| 05/07 | 4633 | 256 | 29958 | 6486 | 76928 | 26070 | 25987 | 7392 | 30615 | 5288 |
| 05/08 | 4633 | 256 | 30201 | 6541 | 78615 | 26299 | 26230 | 7510 | 31241 | 5359 |
| 05/09 | 4633 | 256 | 30395 | 6589 | 80037 | 26478 | 26310 | 7549 | 31587 | 5422 |
| 05/10 | 4633 | 256 | 30560 | 6640 | 80787 | 26621 | 26380 | 7569 | 31855 | 5440 |
| 05/11 | 4633 | 256 | 30739 | 6685 | 81847 | 26744 | 26643 | 7661 | 32065 | 5456 |
| 05/12 | 4633 | 258 | 30911 | 6733 | 83718 | 26920 | 26991 | 7738 | 32692 | 5510 |
| 05/13 | 4633 | 259 | 31106 | 6783 | 85540 | 27104 | 27074 | 7861 | 33186 | 5562 |
| 05/14 | 4633 | 260 | 31368 | 6854 | 87293 | 27321 | 27425 | 7928 | 33614 | 5590 |
| 05/15 | 4633 | 260 | 31610 | 6902 | 88895 | 27459 | 27529 | 8001 | 33988 | 5643 |
| 05/16 | 4633 | 262 | 31763 | 6937 | 90113 | 27563 | 27625 | 8027 | 34466 | 5670 |
| 05/17 | 4634 | 262 | 31908 | 6988 | 90978 | 27650 | 28108 | 8049 | 34636 | 5680 |
| 05/18 | 4634 | 263 | 32007 | 7057 | 91981 | 27709 | 28239 | 8123 | 34796 | 5694 |
| 05/19 | 4634 | 263 | 32169 | 7119 | 93533 | 27778 | 28022 | 8193 | 35341 | 5715 |
| 05/20 | 4634 | 263 | 32330 | 7183 | 94936 | 27888 | 28132 | 8270 | 35704 | 5748 |
| 05/21 | 4634 | 264 | 32486 | 7249 | 96347 | 27940 | 28215 | 8309 | 36042 | 5775 |

|       |      |     |       |      |        |       |       |      |       |      |
|-------|------|-----|-------|------|--------|-------|-------|------|-------|------|
| 05/22 | 4634 | 264 | 32616 | 7300 | 97645  | 28628 | 28289 | 8352 | 36393 | 5788 |
| 05/23 | 4634 | 266 | 32735 | 7359 | 98678  | 28678 | 28332 | 8366 | 36675 | 5810 |
| 05/24 | 4634 | 266 | 32785 | 7417 | 99293  | 28752 | 28367 | 8371 | 37116 | 5822 |
| 05/25 | 4634 | 267 | 32877 | 7451 | 99798  | 26837 | 28432 | 8428 | 37237 | 5830 |
| 05/26 | 4634 | 269 | 32955 | 7508 | 100572 | 27117 | 28530 | 8498 | 37373 | 5856 |
| 05/27 | 4634 | 269 | 33072 | 7564 | 102107 | 27118 | 28596 | 8533 | 37807 | 5871 |
| 05/28 | 4634 | 269 | 33142 | 7627 | 103330 | 27119 | 28662 | 8570 | 38220 | 5903 |
| 05/29 | 4634 | 269 | 33229 | 7677 | 104542 | 27121 | 28714 | 8594 | 38593 | 5931 |
| 05/30 | 4634 | 269 | 33340 | 7734 | 105557 | 27125 | 28771 | 8600 | 38819 | 5951 |
| 05/31 | 4634 | 270 | 33415 | 7797 | 106195 | 27127 | 28802 | 8605 | 38934 | 5956 |
| Date  | CN   | SK  | IT    | IR   | US     | SP    | FR    | DE   | UK    | NE   |

The graphs that were generated for several of the countries listed in **Table-1** include the following curves:

- (1) Actual data  $y_a(t)$  and the actual data model estimates curve  $\hat{y}_a(t)$ .
- (2) The natural logarithm of the actual data  $y_1(t)$  and the model estimate curve  $\hat{y}_1(t)$ .
- (3) The linearization of the actual data logarithm  $y_2(t)$  and the linear fit  $\hat{y}_2(t)$ .
- (4) The derivative of the actual data model  $d\hat{y}_a(t)/dt$ .
- (5) Some additional graphs of interest, like fit residuals are in some cases provided.

Included also with the figures are the horizontal asymptote value  $y_\infty$  for the natural logarithm of the actual data and the process P1 time constant  $\tau = 1/\alpha$  [days], both parameters corresponding to our model, the curve  $\hat{y}_1(t)$ .

Some additional information is provided when applicable, such as changes in the data recorded.

Data extrapolations are indicated via asterisks, following the model estimate curves.

# [1] Modeling Applied to China (CN)

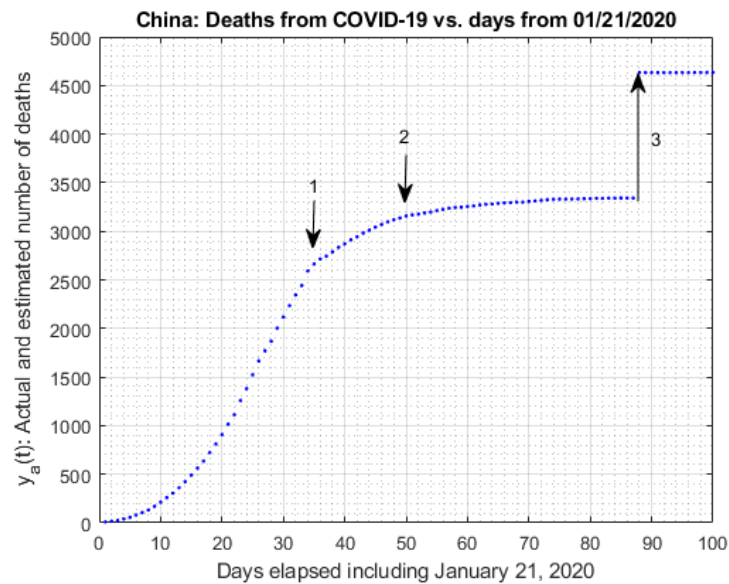

**Figure S1 (CN):** Actual Reported Data. There is a markedly step in the first time-derivative in point indicated by (1) that occurred around February 23, and another minor step in the first derivative indicated by (2) that occurred around March 10, 2020, and a major correction between April 16 and 17, 2020, from 3342 accumulated presumed deaths to 4632, a jump of 1290 presumed deaths. Because of these critical points in the actual curve above, the authors modeled (and extrapolated) the pandemic presumed deaths using only the data recorded at the beginning up to break point (1) in this graph. The best fit provided extrapolation estimates that joined the correction after the jump (3) very closely. This is shown in the following FigureS2.

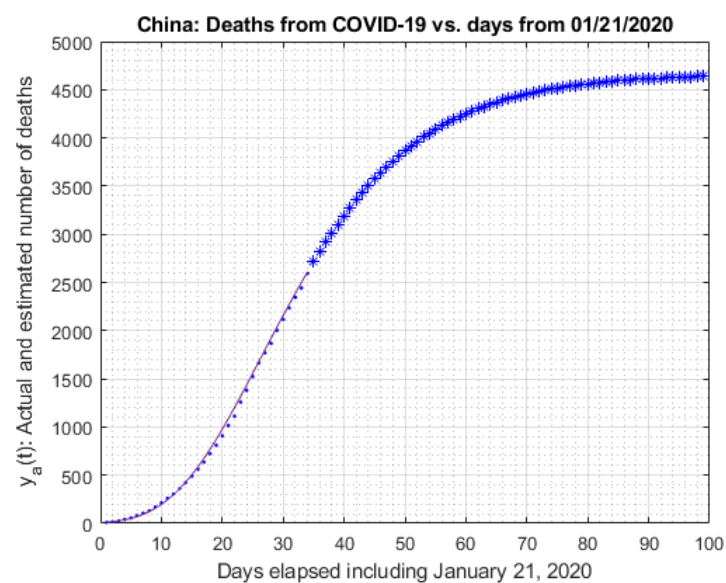

**Figure S2 (CN):** Actual and Extrapolated number of presumed deaths using only the consistent data from January 21 to February 23.

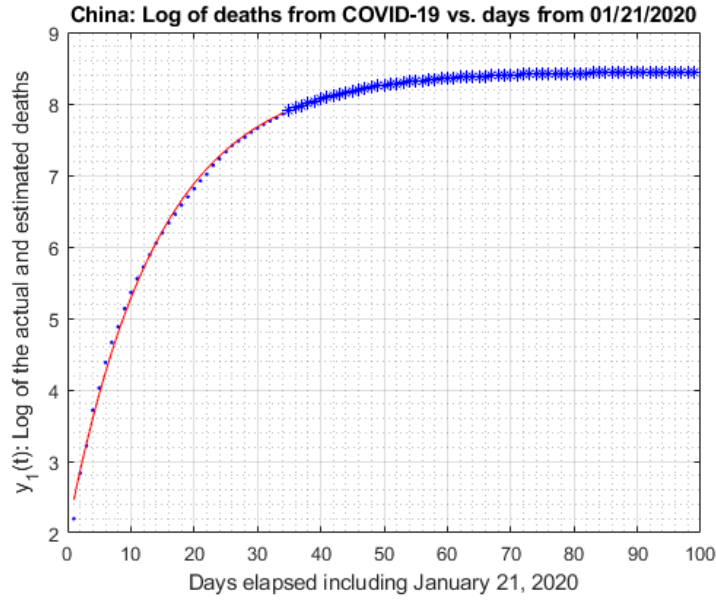

**Figure S3 (CN):** Natural Logarithm of the Actual (and extrapolated) Data in Figure S2.

**Note:** In this figure the plateau or saturation value is  $y_{\infty} = 8.448$  and the time-constant is  $\tau = 14.1493$  days. These numbers indicate that the number of presumed deaths might reach a value of  $y_a(t \rightarrow \infty) = \exp(8.448) \simeq 4666$  people. The sum of squares of the residuals (i.e.,  $r_i(t) = \hat{y}_1(t) - y_1(t)$  for estimated minus actual values) for this data is  $RSS = (\mathbf{r}^T \mathbf{r})^{1/2} = 0.4399$

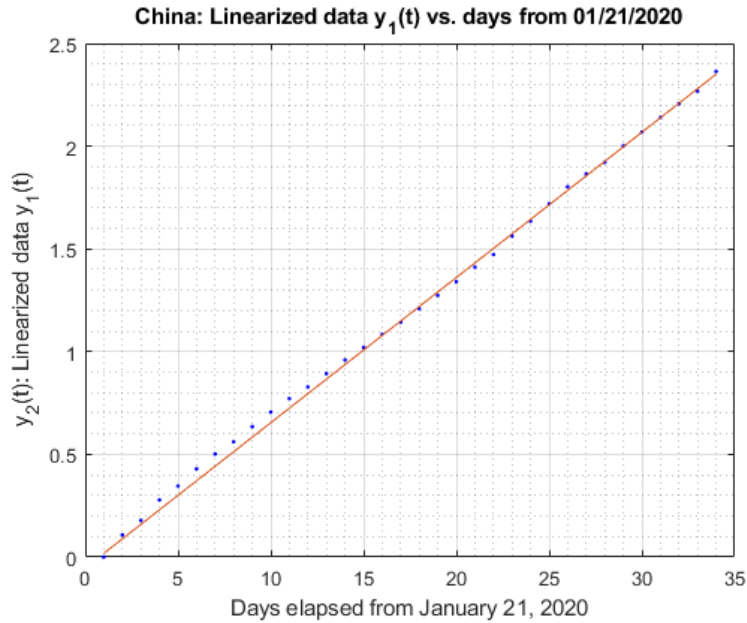

**Figure S4 (CN):** Linearization of Data in Figure S3 (dots) and Weighted Least Squares Linear Fit (continuous curve).

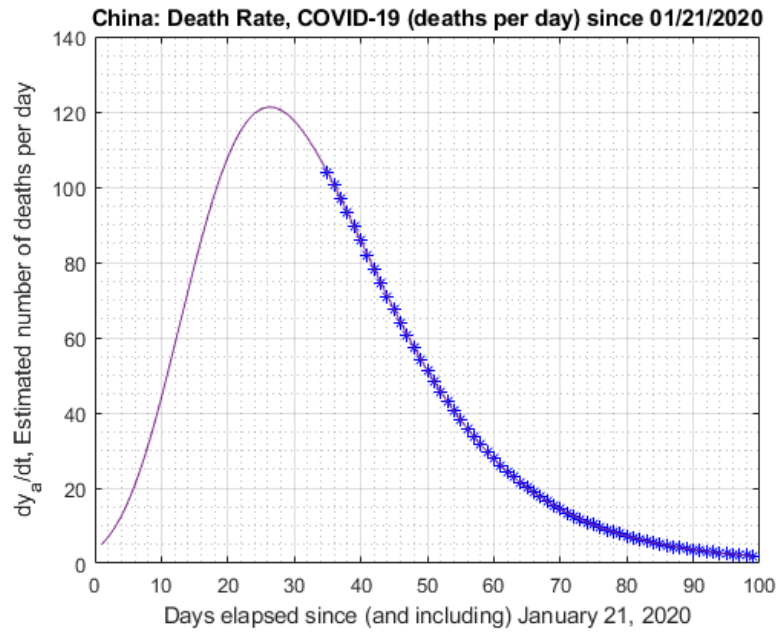

**Figure S5 (CN):** Date Rate corresponding to the Derivative of the Estimated Data in Figure S2. The peak occurred in February 15, 2020.

## [2] Modeling Applied to South Korea (SK)

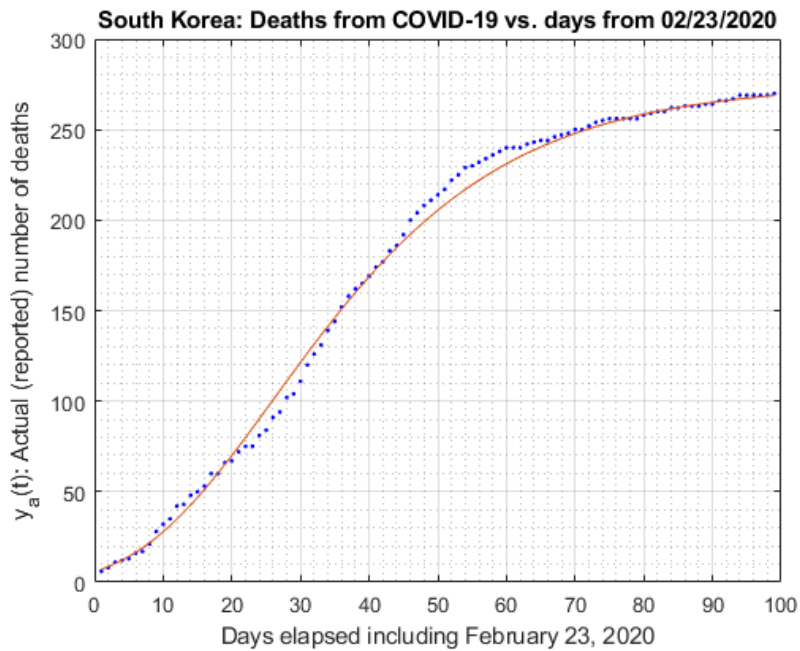

**Figure S6 (SK):** Actual and modeled number of presumed deaths using only data from February 23, 2020.

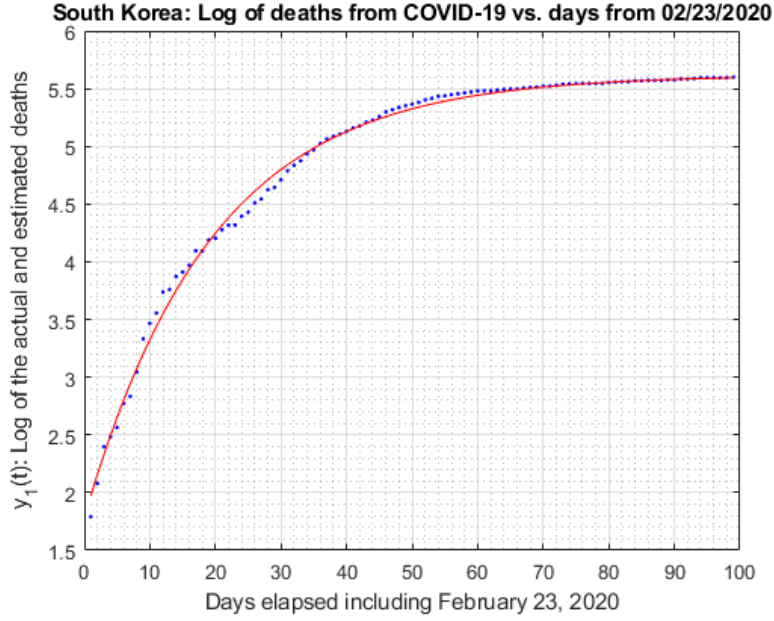

**Figure S7 (SK):** Natural Logarithm of the Actual (and extrapolated) Data in Figure S6.

**Note:** In this figure the plateau or saturation value is  $y_{\infty}=5.6173$  and the time-constant is  $\tau=19.415$  days. These numbers indicate that the number of presumed deaths might reach a value of  $y_a(t \rightarrow \infty) = \exp(5.6173) \simeq 275$  people. The sum of squares of the residuals (i.e.,  $r_i(t) = \hat{y}_1(t) - y_1(t)$  for estimated minus actual values) for this data is  $RSS = (\mathbf{r}^T \mathbf{r})^{1/2} = 0.5745$ .

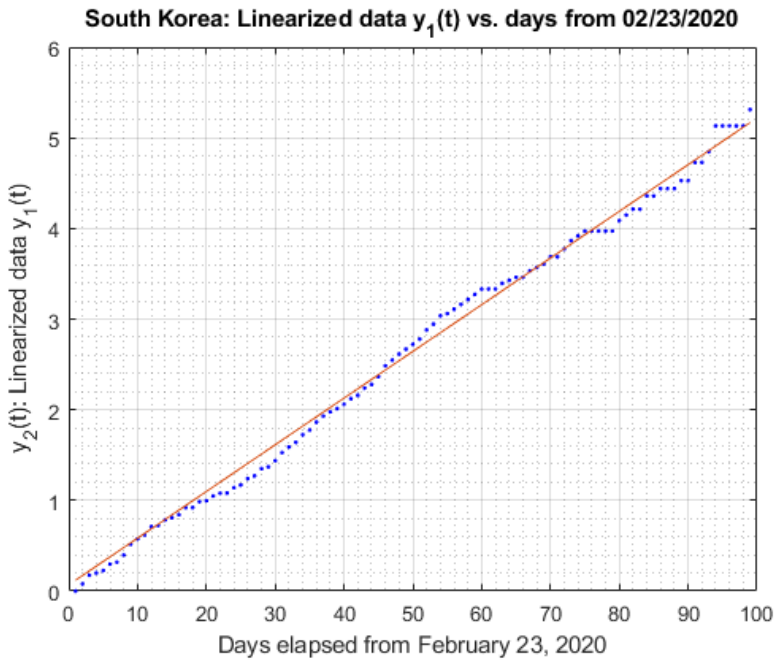

**Figure S8 (SK):** Linearization of Data in Figure S7 (dots) and Weighted Least Squares Linear Fit (continuous curve).



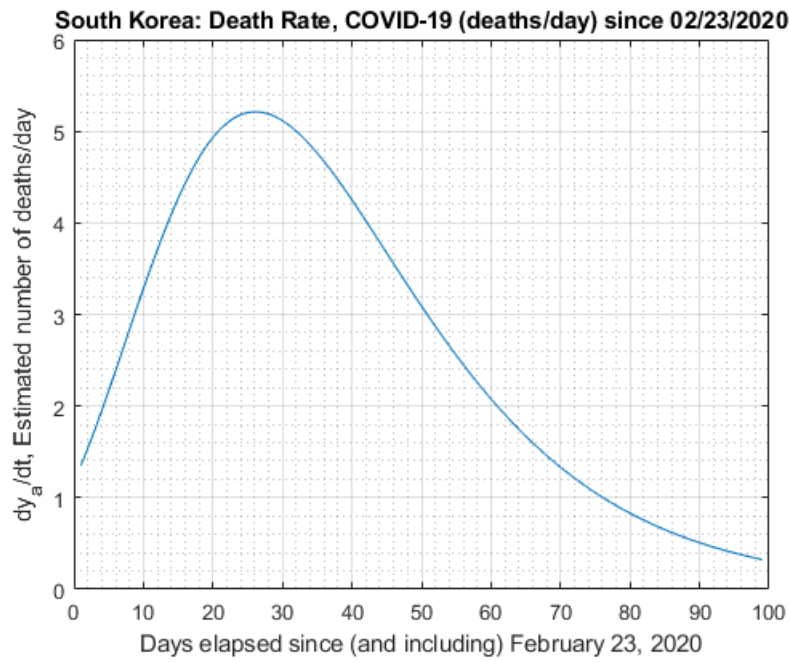

**Figure S9 (SK):** Date Rate corresponding to the Derivative of the Estimated Data in **Figure S6**. The peak occurred in March 19, 2020 according to the model.

### [3] Modeling Applied to Italy (IT)

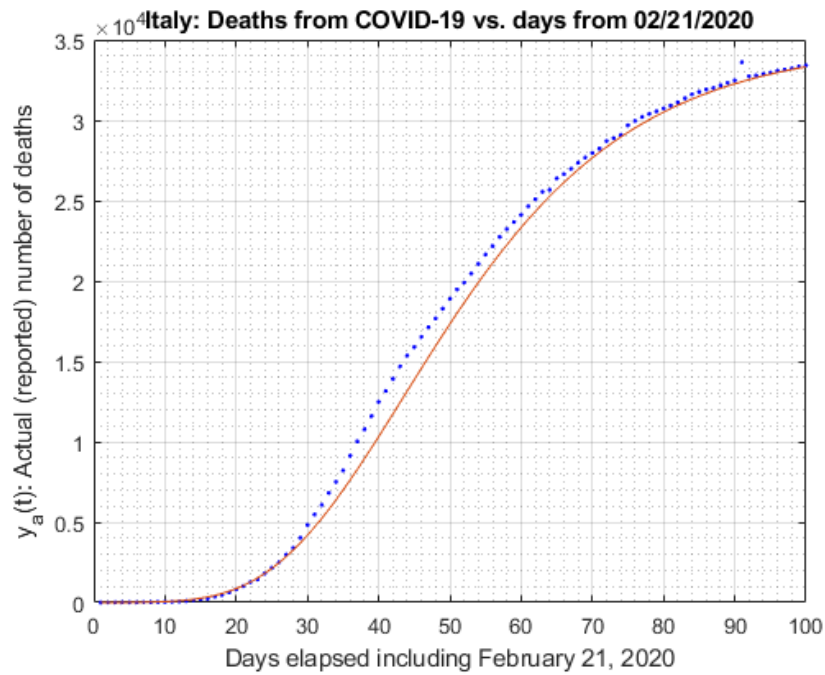

**Figure S10 (IT):** Actual and modeled number of presumed deaths using only data from February 21, 2020

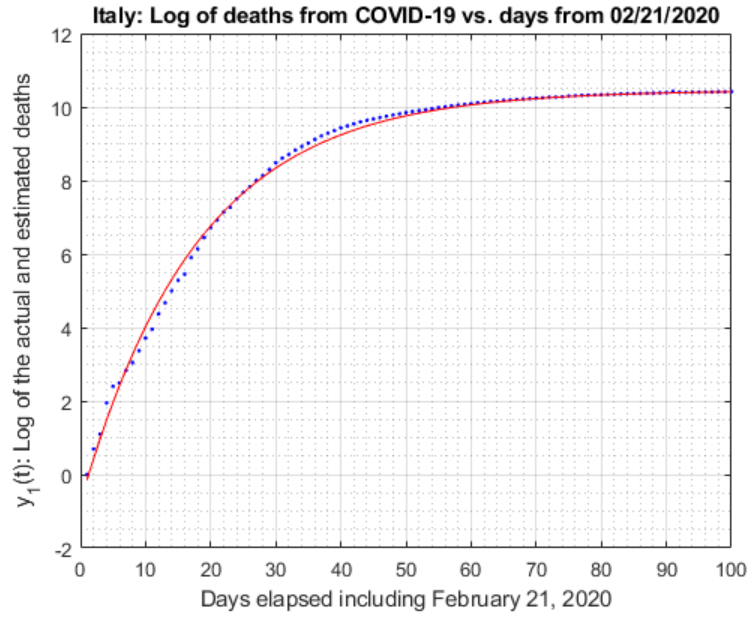

**Figure S11 (IT):** Natural Logarithm of the Actual (and extrapolated) Data in Figure S10.

**Note:** In this figure the plateau or saturation value is  $y_{\infty}=10.4574$  and the time-constant is

$\tau=18.0002$  days. These numbers indicate that the number of presumed deaths might reach a value of  $y_a(t \rightarrow \infty) = \exp(10.4574) \simeq 34801$  people. The sum of squares of the residuals (i.e.,  $r_i(t) = \hat{y}_1(t) - y_1(t)$  for estimated minus actual values) for this data is  $RSS = (\mathbf{r}^T \mathbf{r})^{1/2} = 1.4644$ .

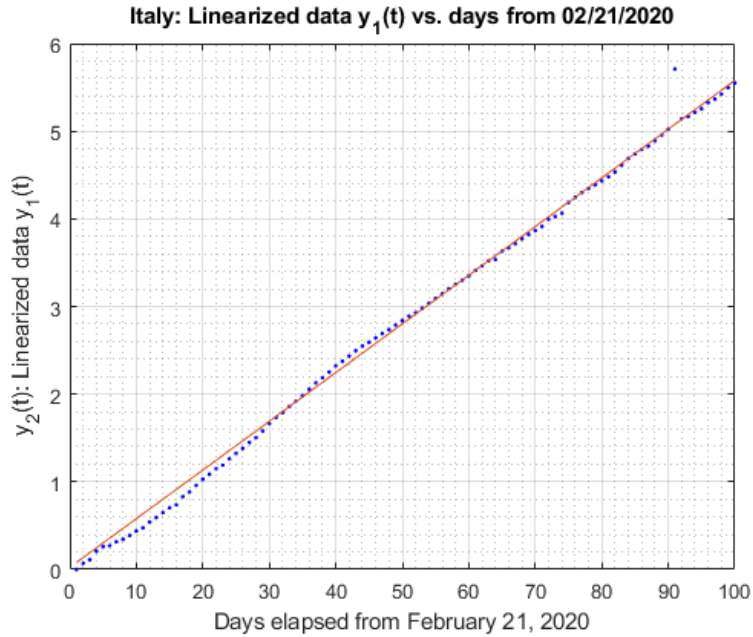

**Figure S12 (IT):** Linearization of Data in Figure S11 (dots) and Weighted Least Squares Linear Fit (continuous curve).

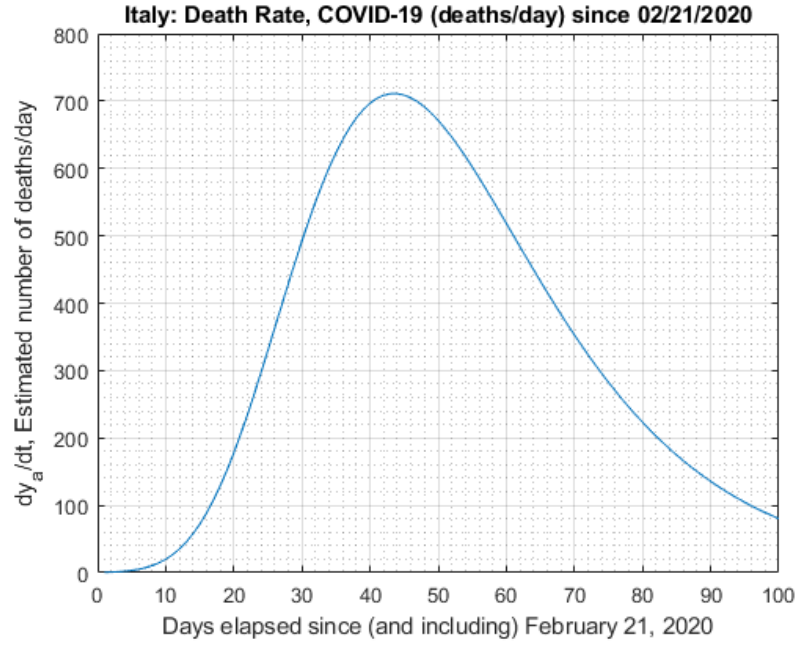

**Figure S13 (IT):** Date Rate corresponding to the Derivative of the Estimated Data in **Figure S10**. The peak occurred in April 04, 2020 according to the model.

#### [4] Modeling Applied to Iran (IR)

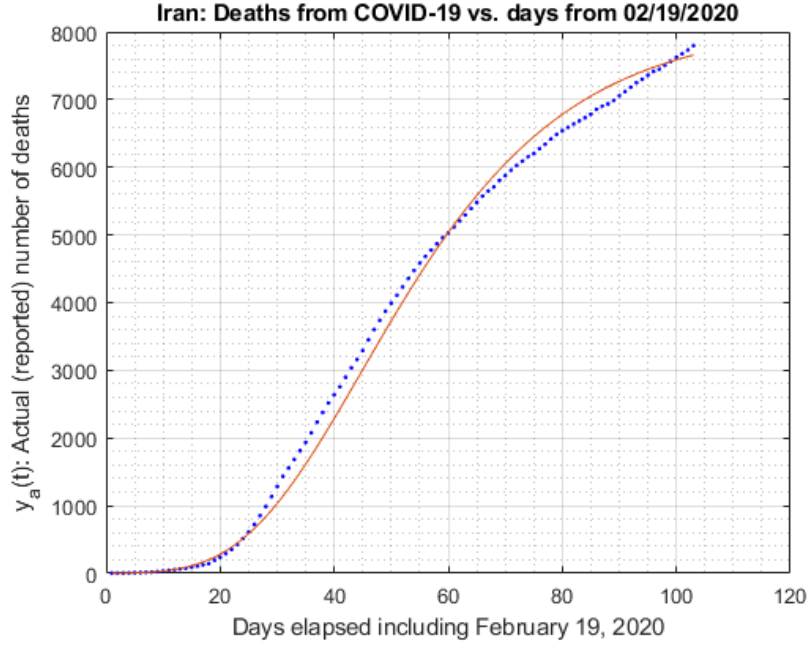

**Figure S14 (IR):** Actual and modeled number of presumed deaths using only data from February 19, 2020

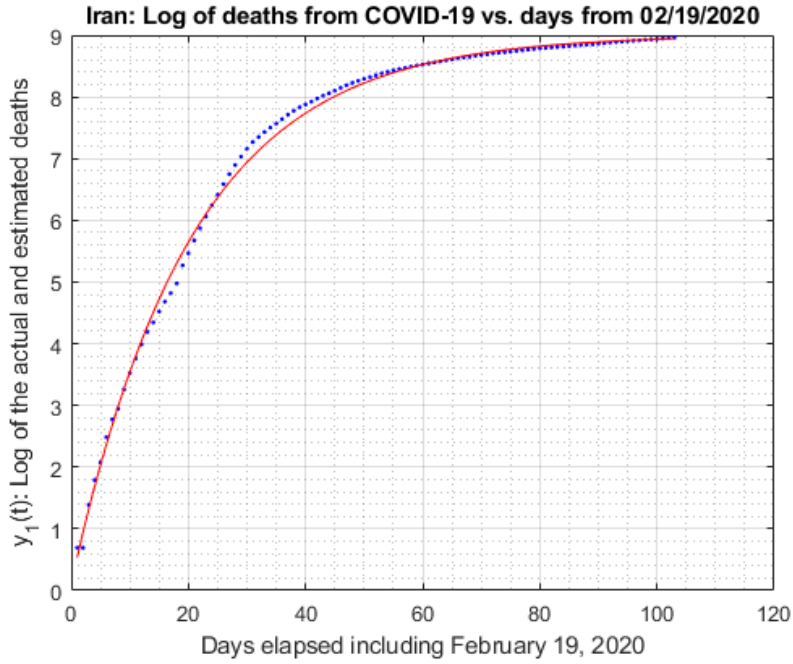

**Figure S15 (IR):** Natural Logarithm of the Actual Data in Figure S14.

**Note:** In this figure the plateau or saturation value is  $y_{\infty}=9.00253$  and the time-constant is  $\tau=20.5296$  days.

These numbers indicate that the number of presumed deaths might reach a value of  $y_a(t \rightarrow \infty) = \exp(9.00253) \simeq 8124$  people. The sum of squares of the residuals (i.e.,  $r_i(t) = \hat{y}_1(t) - y_1(t)$  for estimated minus actual values) for this data is  $RSS = (\mathbf{r}^T \mathbf{r})^{1/2} = 1.0933$ .

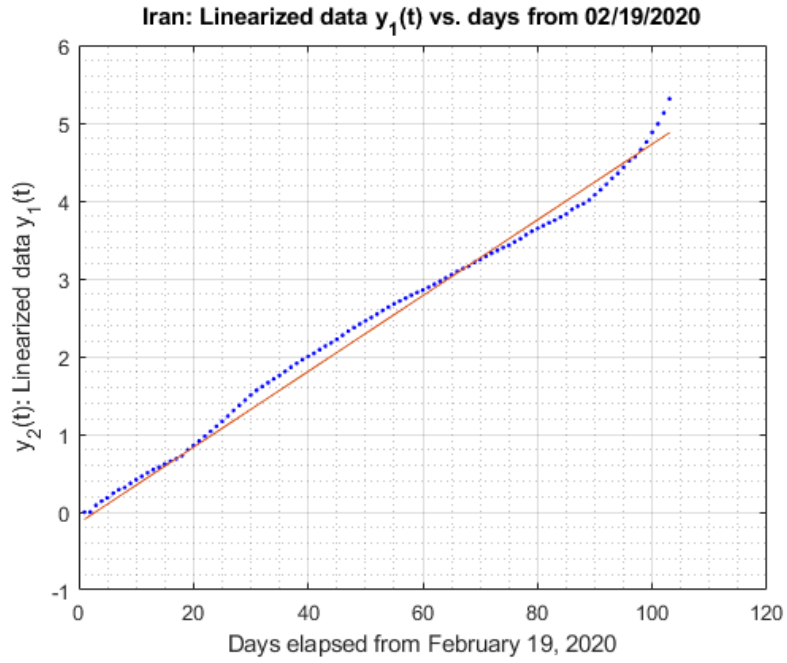

**Figure S16 (IR):** Linearization of Data in Figure S15 (dots) and Weighted Least Squares Linear Fit (continuous curve).

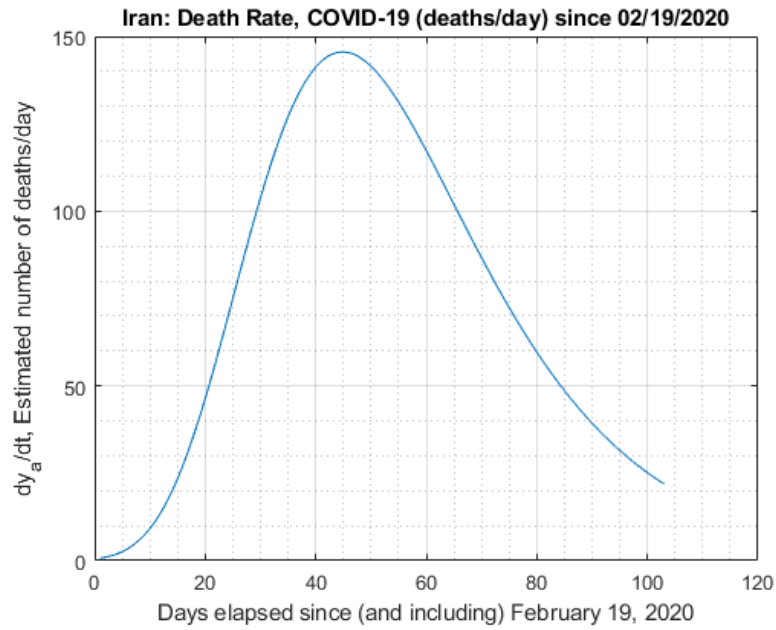

**Figure S17 (IR):** Date Rate corresponding to the Derivative of the Estimated Data in Figure S14. The peak occurred in April 03, 2020 according to the model.

#### [5] Modeling Applied to USA (US)

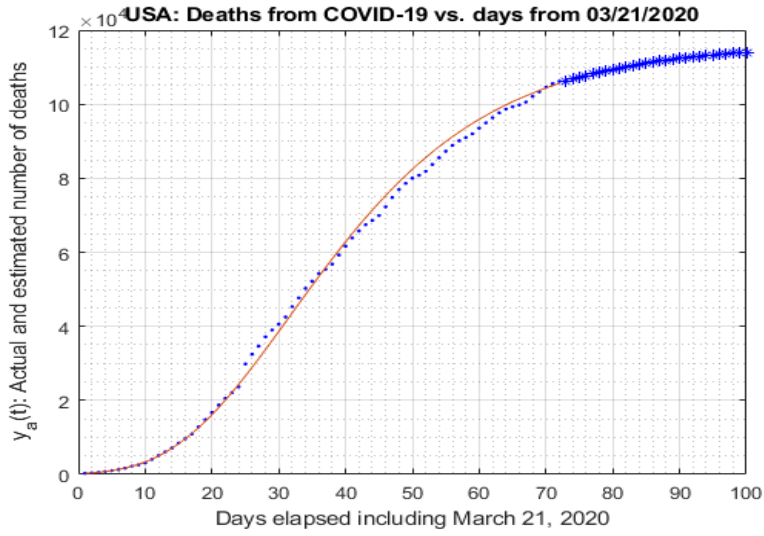

**Figure S18 (US):** Actual Data (dots) and Model Estimate (continuous curve)

**Note:** In the following figure (**Figure A-2**), the plateau or saturation value is  $y_{\infty}=11.6622$  and the time-constant  $\tau=17.1261$  days. These numbers indicate that the number of presumed deaths might reach a value of  $y_a(t \rightarrow \infty)=\exp(11.6622) \simeq 116,099$  people. The sum of squares of the residuals (i.e.,  $r_i(t)=\hat{y}_i(t)-y_i(t)$  for estimated minus actual values) for this data is  $RSS = (\mathbf{r}^T \mathbf{r})^{1/2} = 0.3230$ .

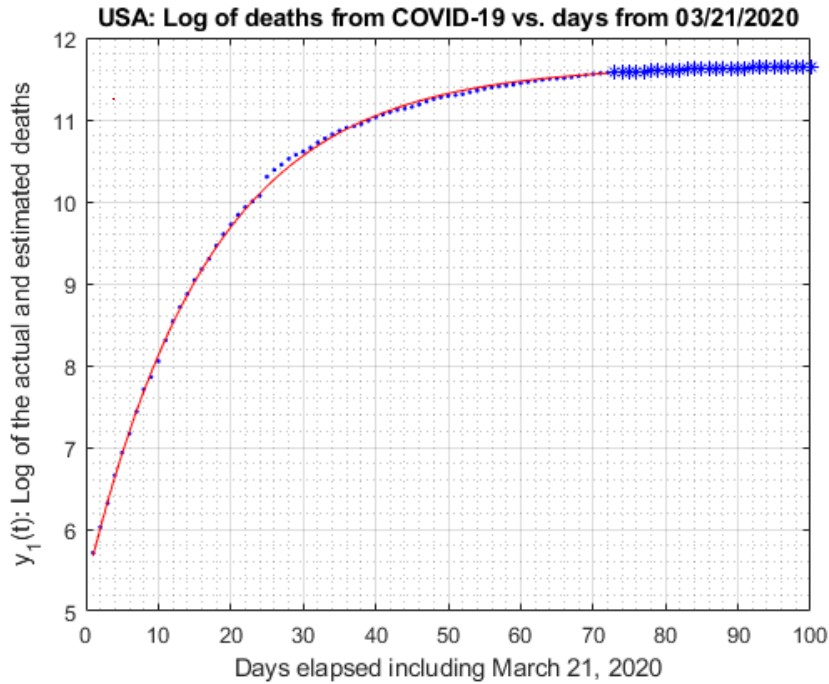

**Figure S19 (US):** Natural Logarithm of Actual Data in Figure S18 (dots) and Model Estimate (continuous curve). Here  $y_{\infty}=11.6622$  and  $\tau=17.126$  days.

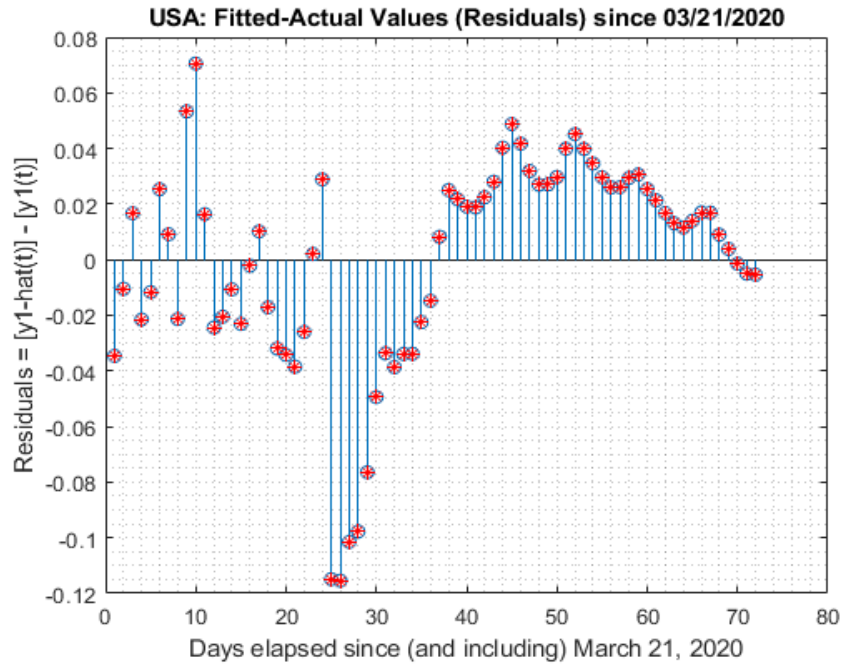

**Figure S20 (US):** Residuals  $r_i(t) = \hat{y}_1(t) - y_1(t)$  of fitted minus actual data shown in Figure S19. An unexplained weekly periodicity can be observed in the residuals throughout.

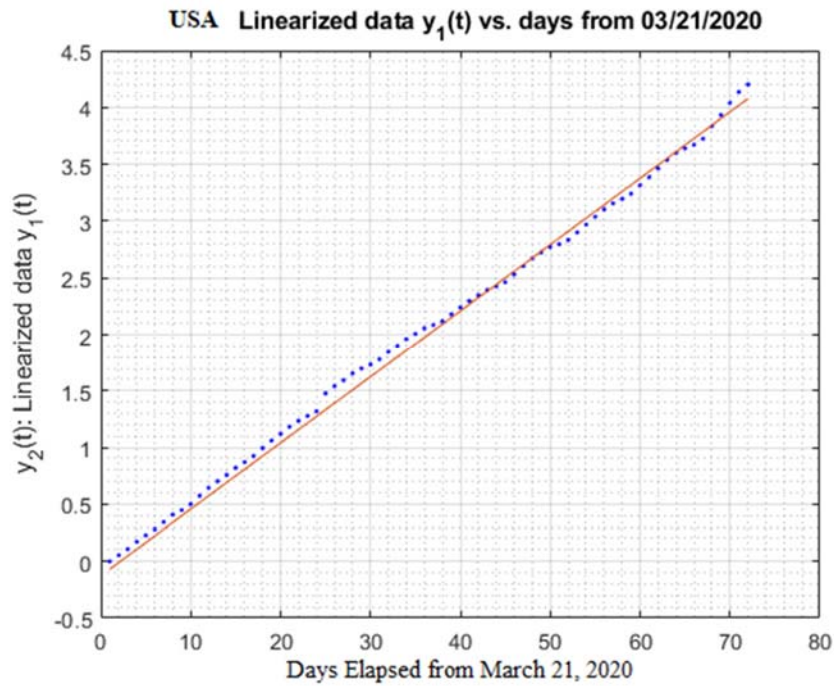

**Figure S21 (US):** Linearization of Data in Figure S19 (dots) and Weighted Least Squares Linear Fit (continuous curve).

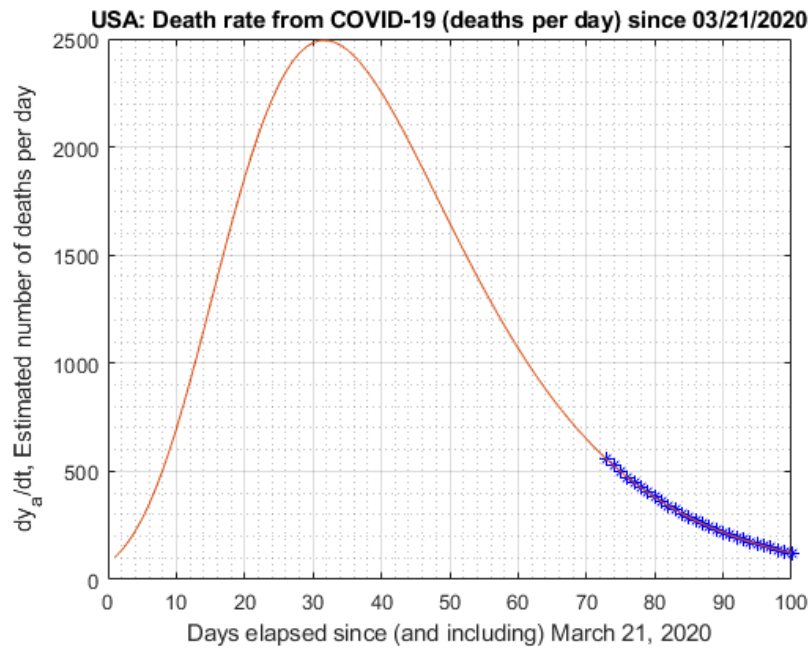

**Figure S22 (US):** Date Rate corresponding to the Derivative of the Estimated Data in Figure S18. The peak occurred in April 22, 2020, according to the model.

#### [6] Modeling Applied to Spain (SP)

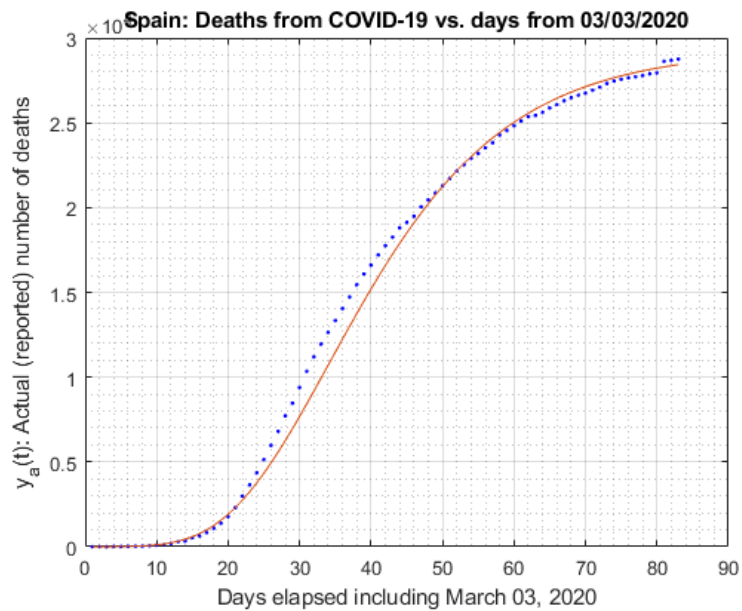

**Figure S23 (SP):** Actual and modeled number of presumed deaths using only data from March 03, 2020.



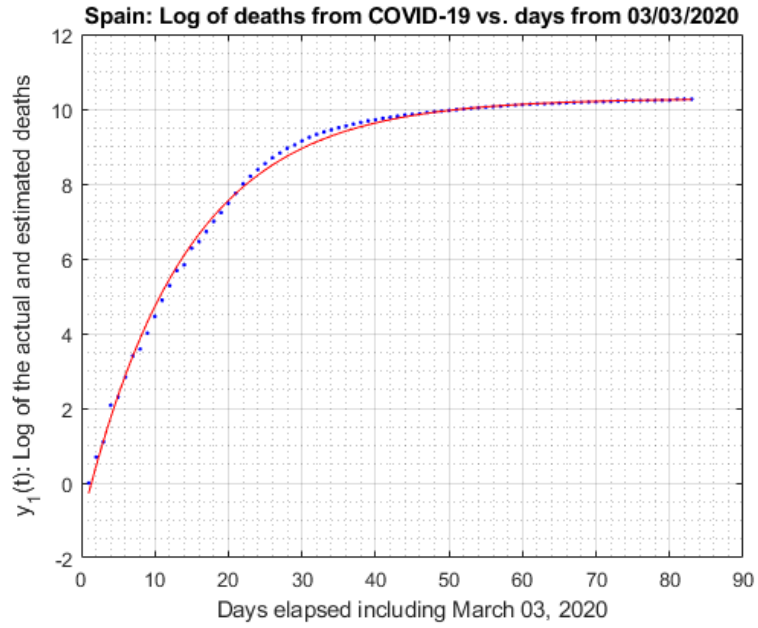

**Figure S24 (SP):** Natural Logarithm of the Actual (and extrapolated) Data in Figure S23.

**Note:** In this figure the plateau or saturation value is  $y_{\infty}=10.28584$  and the time-constant is

$\tau=14.0376$  days. These numbers indicate that the number of presumed deaths might reach a value of  $y_a(t \rightarrow \infty)=\exp(10.28584) \simeq 29315$  people. The sum of squares of the residuals (i.e.,

$r_i(t)=\hat{y}_1(t)-y_1(t)$  for estimated minus actual values) for this data is  $RSS = (\mathbf{r}^T \mathbf{r})^{1/2} = 1.376$

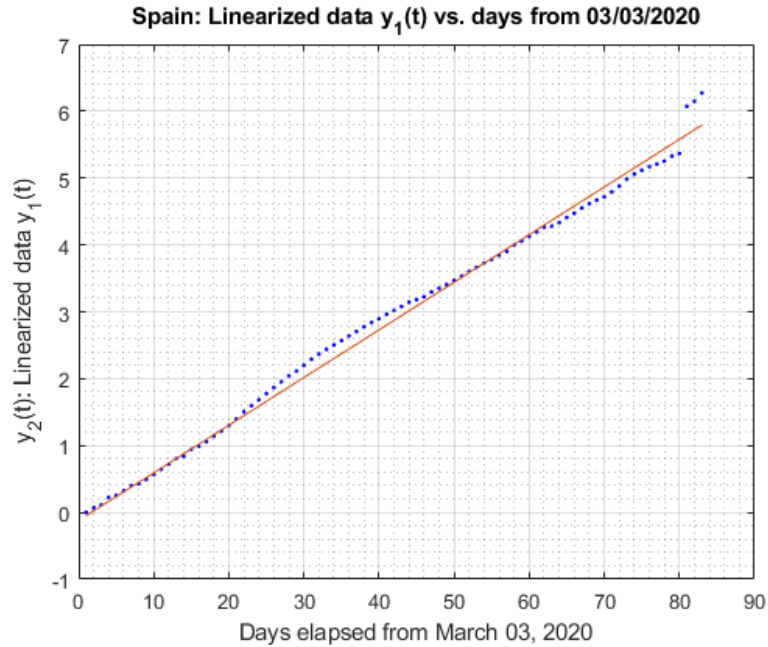

**Figure S25 (SP):** Linearization of Data in Figure S24 (dots) and Weighted Least Squares Linear Fit (continuous curve). The plot clearly shows a jump discontinuity between May 20 and May 21.

The data (not shown here but is included in Table 1) had a down-step from 28752 on 05/25/2020 to 26837 on 05/25, not a correct step for cumulative data, and then another step-up discontinuity on 05/27/2020.

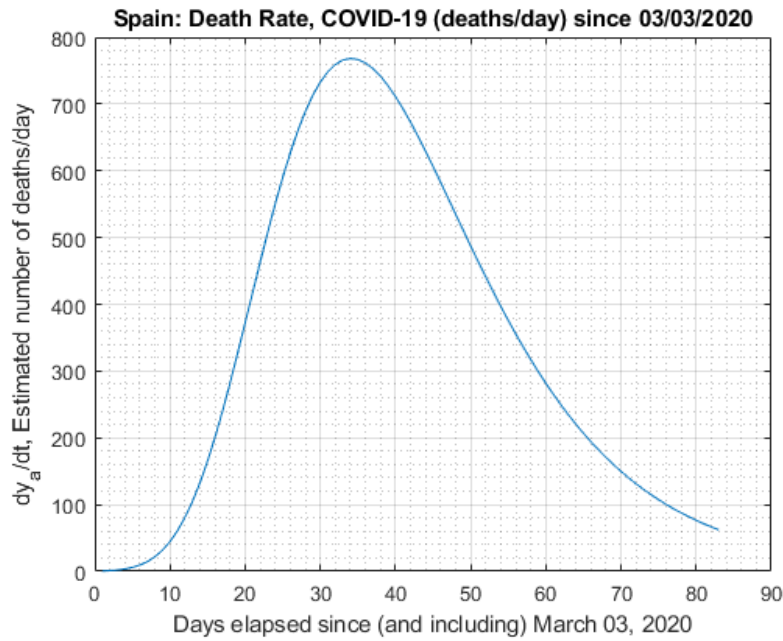

**Figure S26 (SP):** Date Rate corresponding to the Derivative of Estimated Data in Figure S23. The peak occurred in April 05, 2020, according to the model.

#### [7] Modeling Applied to France (FR)

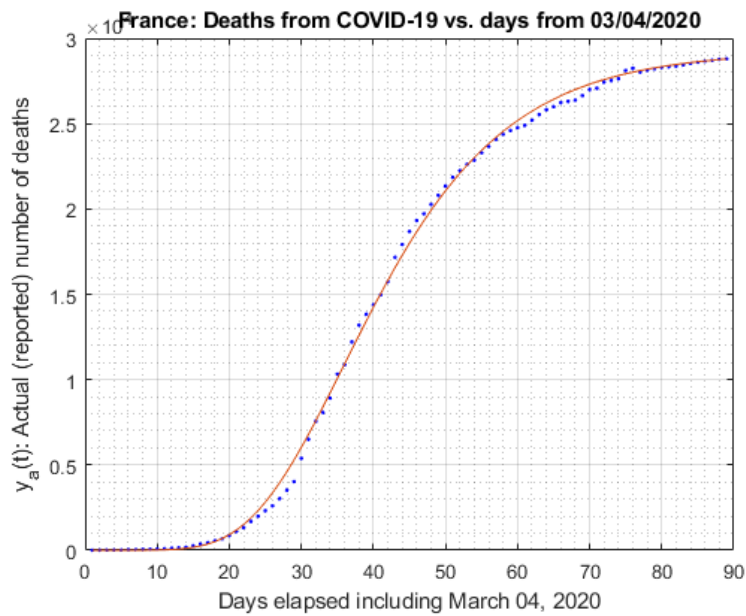

**Figure S27 (FR):** Actual and modeled number of presumed deaths using only data from March 04, 2020.

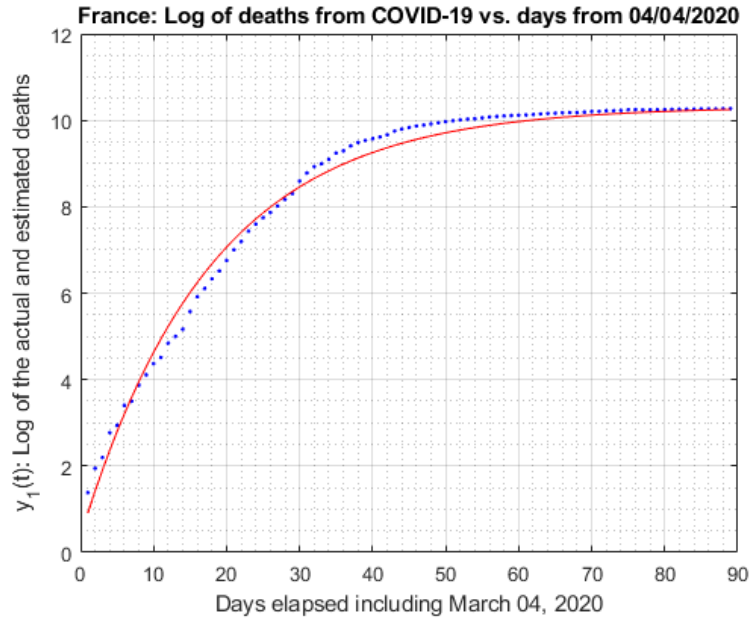

**Figure S28 (FR):** Natural Logarithm of the Actual (and extrapolated) Data in Figure S27.

**Note:** In this figure the plateau or saturation value is  $y_{\infty}=10.3182$  and the time-constant is

$\tau=17.8885$  days. These numbers indicate that the number of presumed deaths might reach a value of  $y_a(t \rightarrow \infty)=\exp(10.3182) \simeq 30279$  people. The sum of squares of the residuals (i.e.,  $r_i(t)=\hat{y}_1(t)-y_1(t)$  for estimated minus actual values) for this data is  $RSS = (\mathbf{r}^T \mathbf{r})^{1/2} = 2.2950$ .

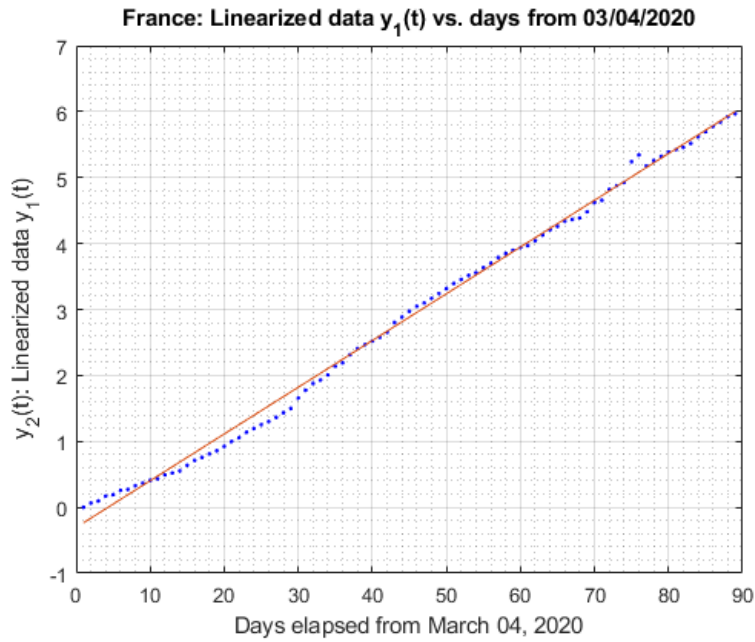

**Figure S29 (FR):** Linearization of Data in Figure S28 (dots) and Weighted Least Squares Linear Fit (continuous curve). The fit improves for later data due to the weighted Least Squares putting higher weights on the later data. A couple of outliers can be observed for elapsed days 75 and 76.

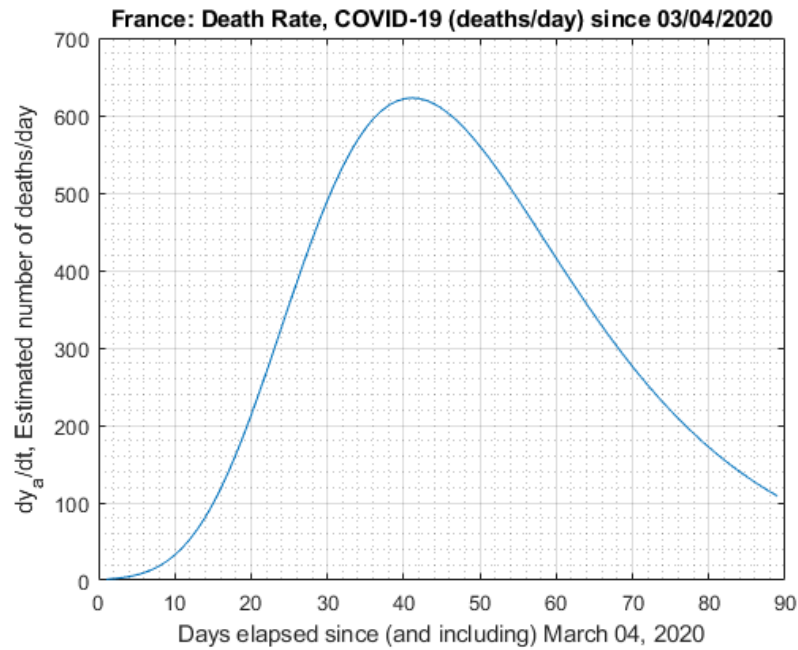

**Figure S30 (FR):** Date Rate corresponding to the Derivative of Estimated Data in Figure S27. The peak occurred in April 13, 2020, according to the model.

#### [8] Modeling Applied to Germany (DE)

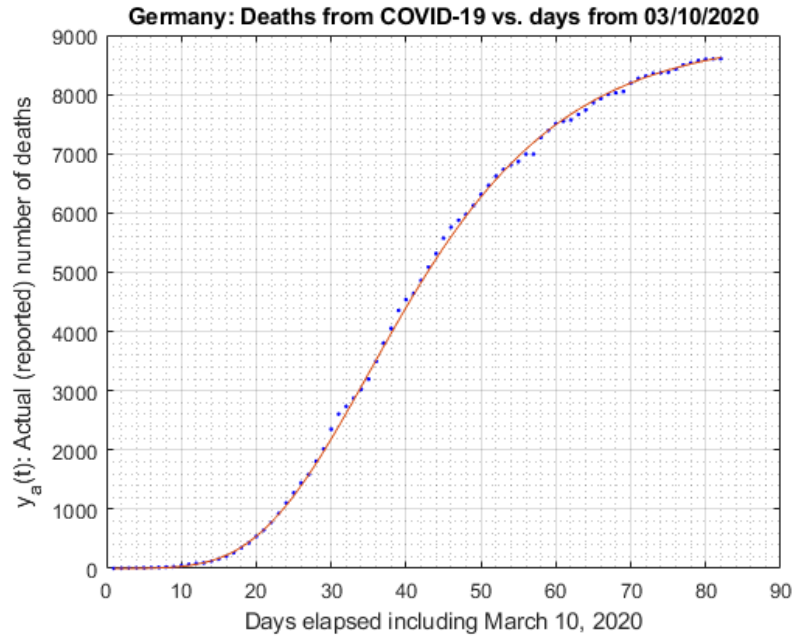

**Figure S31 (DE):** Actual and modeled number of presumed deaths using only data from March 10, 2020.

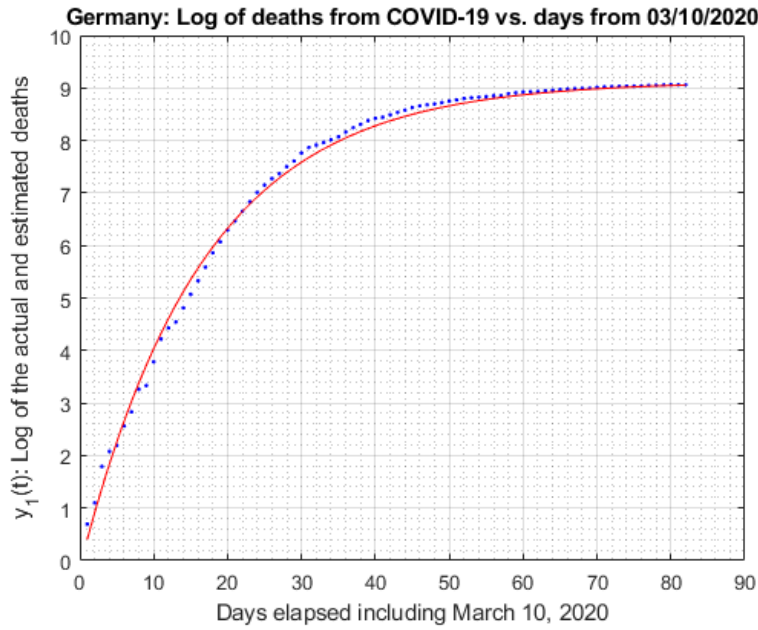

**Figure S32 (DE):** Natural Logarithm of the Actual (and extrapolated) Data in Figure S31.

**Note:** In this figure the plateau or saturation value is  $y_{\infty}=9.1235$  and the time-constant is  $\tau=16.7038$  days. These numbers indicate that the number of presumed deaths might reach a value of  $y_a(t \rightarrow \infty)=\exp(9.1235) \simeq 9168$  people. The sum of squares of the residuals (i.e.,  $r_i(t)=\hat{y}_1(t)-y_1(t)$  for estimated minus actual values) for this data is  $RSS = (\mathbf{r}^T \mathbf{r})^{1/2} = 1.2656$ .

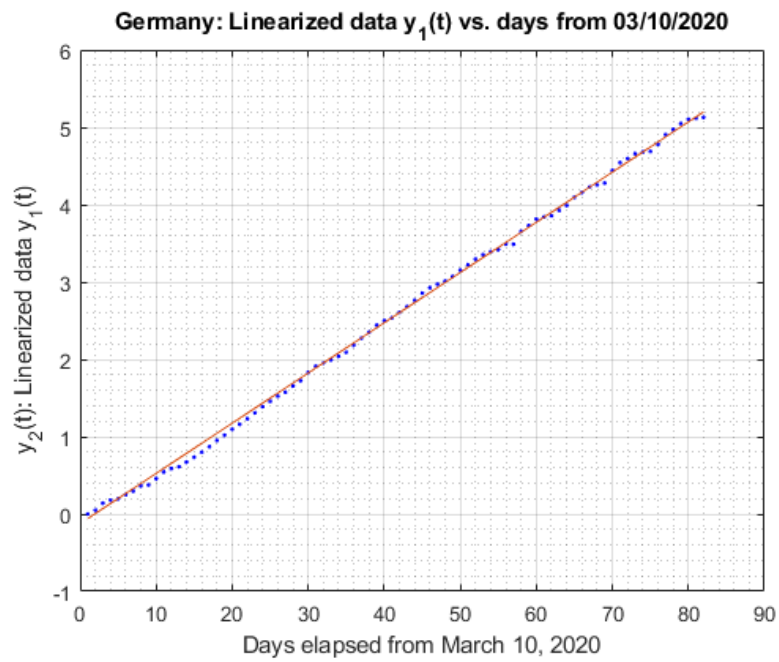

**Figure S33 (DE):** Linearization of Data in Figure S32 (dots) and Weighted Least Squares Linear Fit (continuous curve).

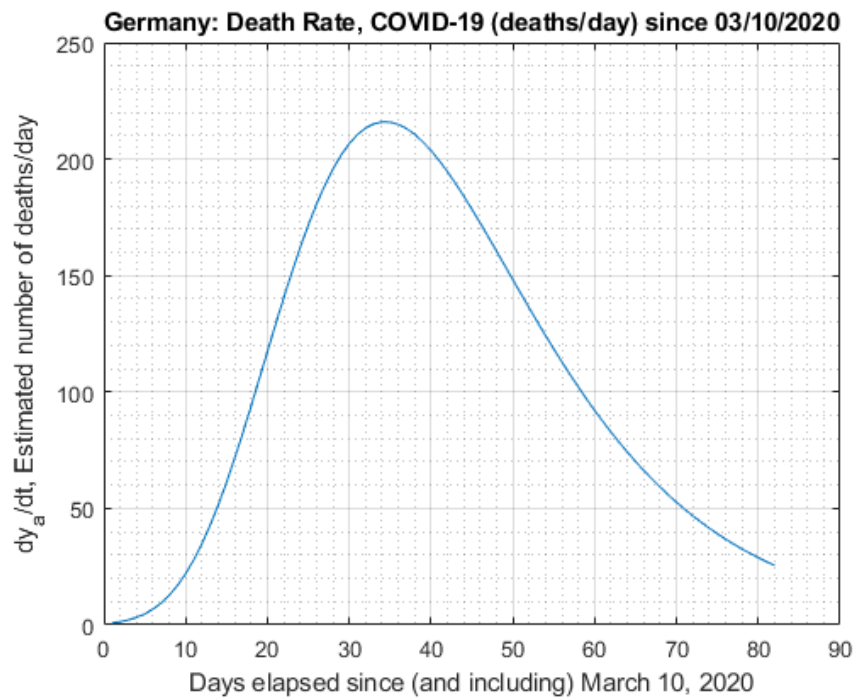

**Figure S34 (DE):** Date Rate corresponding to the Derivative of Estimated Data in Figure S31. The peak occurred in April 13, 2020, according to the model.

[9] Modeling Applied to United Kingdom (UK)

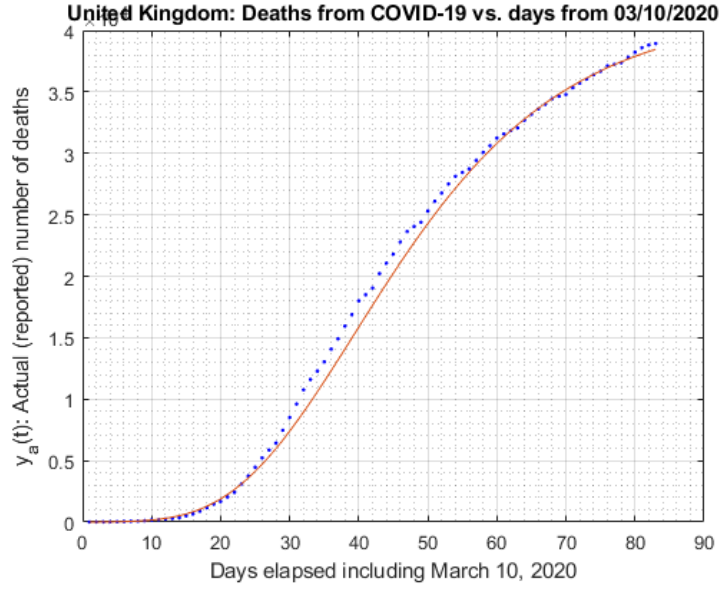

**Figure S35 (UK):** Actual and modeled number of presumed deaths using only data from March 10, 2020.

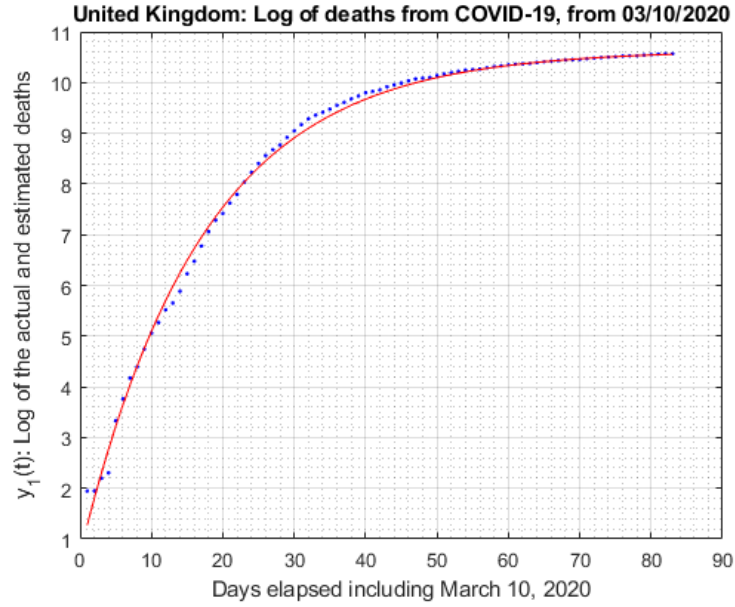

**Figure S36 (UK):** Natural Logarithm of the Actual (and extrapolated) Data in Figure S35.

**Note:** In this figure the plateau or saturation value is  $y_{\infty}=10.636$  and the time-constant is  $\tau=17.1554$  days. These numbers indicate that the number of presumed deaths might reach a value of  $y_a(t \rightarrow \infty)=\exp(10.636) \simeq 41606$  people. The sum of squares of the residuals (i.e.,  $r_i(t)=\hat{y}_1(t)-y_1(t)$  for estimated minus actual values) for this data is  $RSS = (\mathbf{r}^T \mathbf{r})^{1/2} = 1.2653$ .

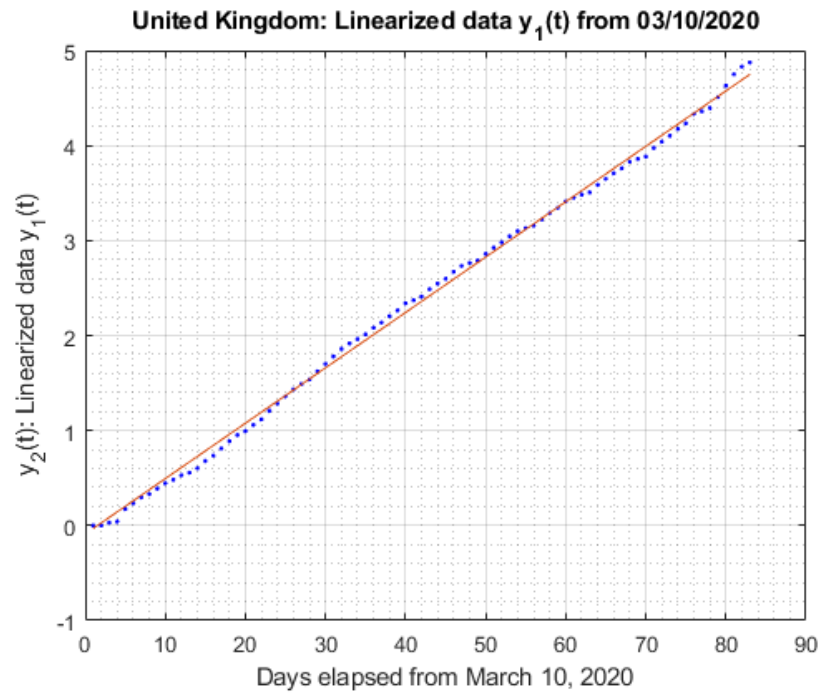

**Figure S37 (UK):** Linearization of Data in Figure S36 (dots) and Weighted Least Squares Linear Fit (continuous curve).

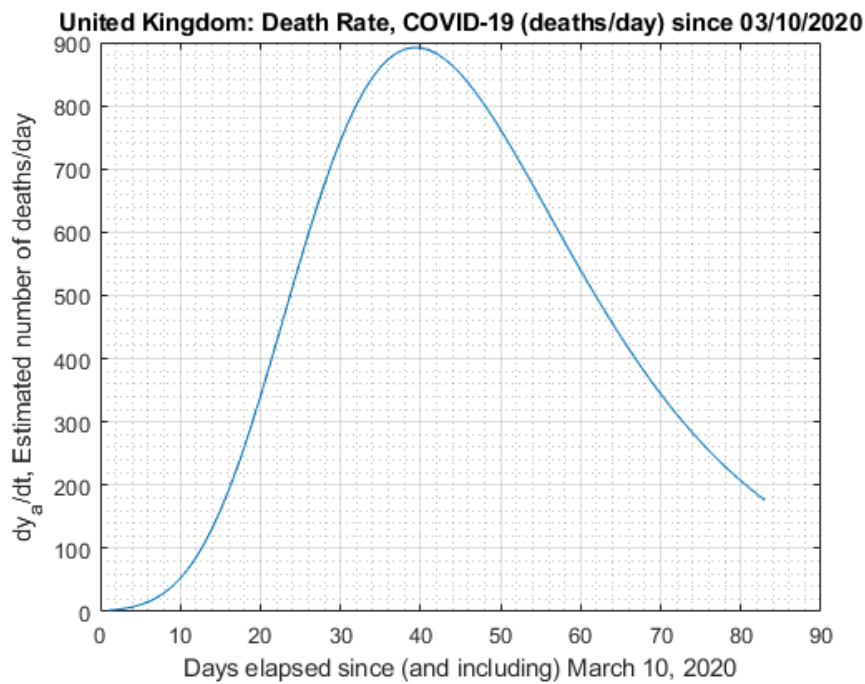

**Figure S38 (UK):** Date Rate corresponding to the Derivative of Estimated Data in Figure S35. The peak occurred in April 17, 2020, according to the model.



[10] Modeling Applied to Netherlands (NE)

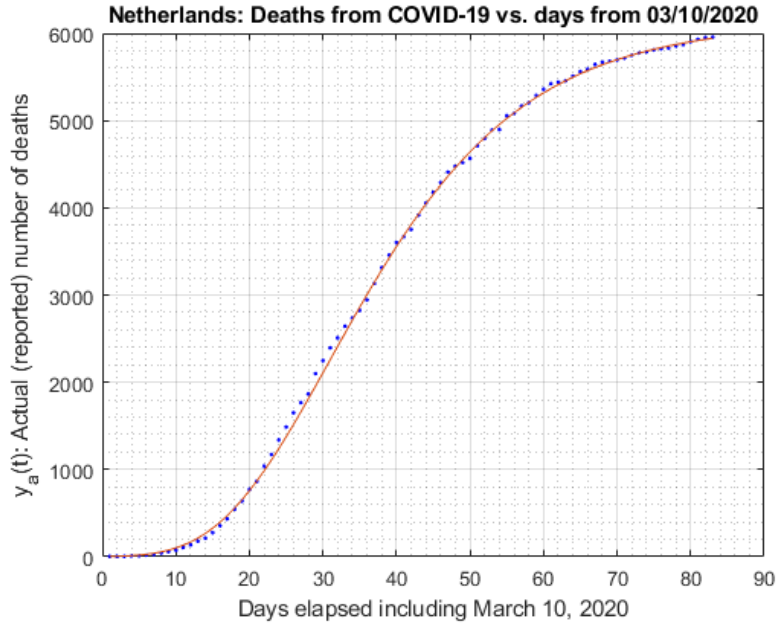

**Figure S39 (NE):** Actual and modeled number of presumed deaths using only data from March 10, 2020.

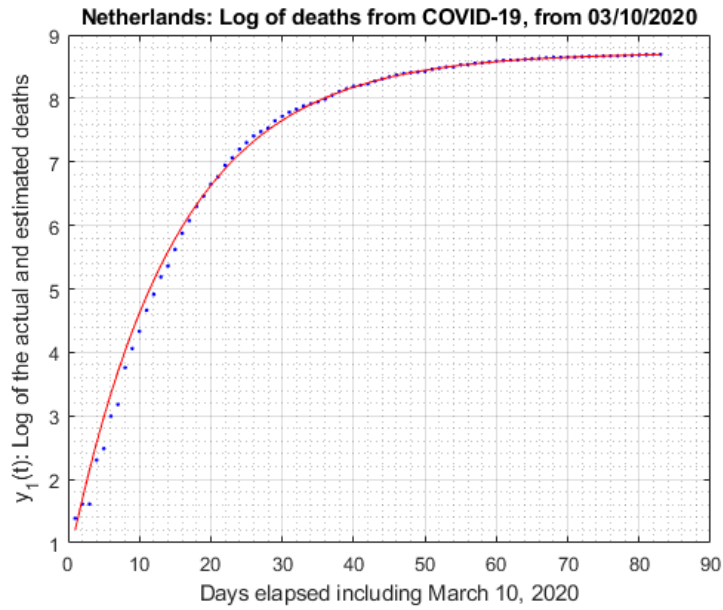

**Figure S40 (NE):** Natural Logarithm of the Actual (and extrapolated) Data in **Figure S39**.

**Note:** In this figure the plateau or saturation value is  $y_{\infty} = 8.720$  and the time-constant is

$\tau = 14.8473$  days. These numbers indicate that the number of presumed deaths might reach a value of  $y_a(t \rightarrow \infty) = \exp(8.720) \simeq 6124$  people. The sum of squares of the residuals (i.e.,

$r_i(t) = \hat{y}_1(t) - y_1(t)$  for estimated minus actual values) for this data is  $RSS = (\mathbf{r}^T \mathbf{r})^{1/2} = 1.2483$ .

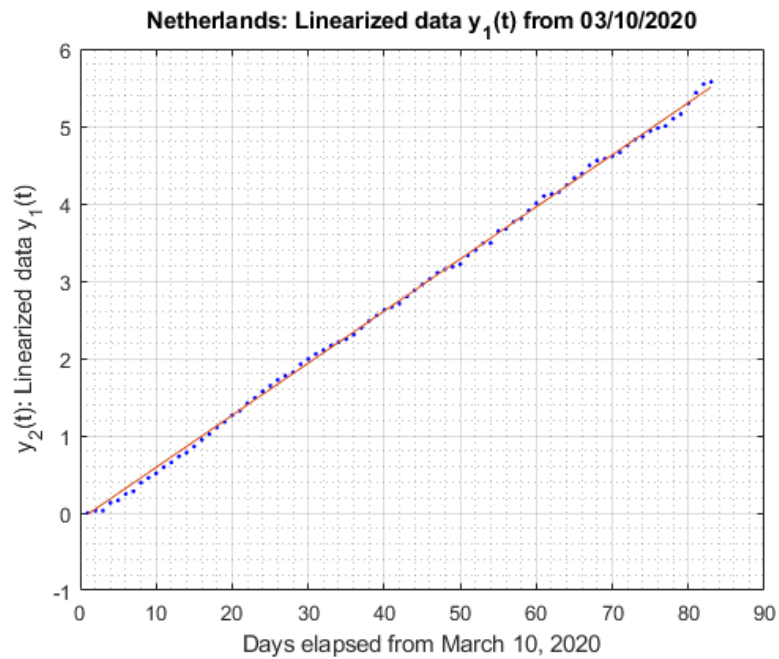

**Figure S41 (NE):** Linearization of Data in Figure S40 (dots) and Weighted Least Squares Linear Fit (continuous curve).

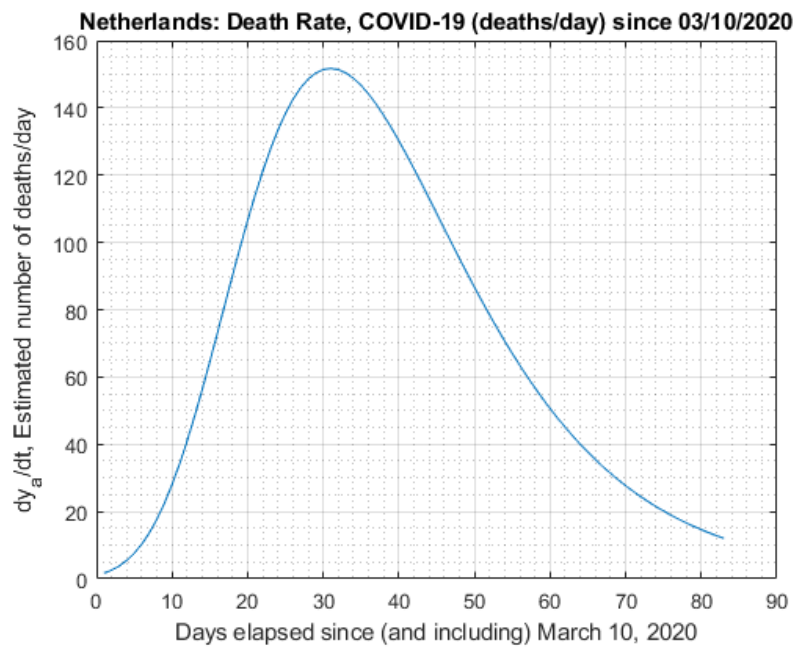

**Figure S42 (NE):** Date Rate corresponding to the Derivative of Estimated Data in Figure S39. The peak occurred in April 09, 2020, according to the model.

**Figure S42** is the last graph in the set of graphs in this **Supplemental Materials** section.

## Mathematics of first-order differential equation

This section is included in this Supplemental Materials as it contains background material that may be useful for readers that would benefit from a brief description of the solution to a first-order differential equation for a Heaviside or step-input function  $u(t)$ .

The first-order model here proposed consists of the response of a first-order system or first-order, linear, constant coefficients differential equation to a Heaviside [or unit step  $u(t)$ ] input (or disturbance) function (scaled by a given amplitude  $A$ ). The response is given in Eq. (5) as

$$y_1(t \geq t_d) = y_\infty - (y_\infty - y_i) e^{-\alpha(t-t_d)}, \quad t \geq t_d$$

This response function is fitted to the data that is computed as the natural logarithm of the actual data, in our COVID-19 case, as the number of deceased people versus days elapsed since some given data-recording start time, and this original (recorded) data generally describes a sigmoidal behavior as a function of time, such as the logistic (or similar) functions.

A first-order Differential equation:

$$\frac{dy}{dt} + ay = f(t) \quad (\text{A.1})$$

Here  $f(t)$  denotes a forcing function, interpreted as the input to a first-order system. Described by the differential equation (A.1). Here we look for the solution to an input  $f(t) = Au(t)$ , a step-function of amplitude  $A$  applied at time  $t = 0$ . So (A.1) is rewritten as the initial-value problem (IVP):

$$\begin{aligned} \frac{dy}{dt} + ay &= Au(t) \\ y(0) &= y_0 \end{aligned} \quad (\text{A.2})$$

Equation (A.2) can be solved via several methods. Using the Laplace transform method, equation (A.2) can be written in the complex-frequency domain as

$$sY(s) - y(0) + aY(s) = \frac{A}{s} \quad (\text{A.3})$$

With some algebra, one obtains

$$Y(s) = \frac{A + sy_0}{s(s+a)} = \frac{k_1}{s} + \frac{k_2}{s+a} \quad (\text{A.4})$$

The partial fraction decomposition coefficients on the RHS of (A.4) are given by:

$$k_1 = \frac{A}{a}, \quad k_2 = -\left(\frac{A}{a} - y_0\right) \quad (\text{A.5})$$

Substituting these coefficients into (A.4) yield

$$Y(s) = \frac{A}{a} \frac{1}{s} - \left( \frac{A}{a} - y_0 \right) \frac{1}{s+a} \quad (\text{A.6})$$

Taking the inverse Laplace transform of (A.6) yields the time-domain solution (or system response)

$$y(t) = \frac{A}{a} - \left( \frac{A}{a} - y_0 \right) \exp(-at) \quad (\text{A.7})$$

It can be shown that (A.7) with  $y_\infty = A/a$  is algebraically the same equation as Eq.(5)

#### References:

1. COVID-19 Coronavirus Pandemic | Worldometer Available online: <https://www.worldometers.info/coronavirus/> (accessed on Oct 27, 2020).
